# Supplementary material
Source: Research Square preprint supplement (doi:10.21203/rs.3.rs-8771557/v1)
Supplement: Supplementary file 1 [file 1a8550a4b54dd942f5402717.docx]

**Supplementary material**

Phytochemical Insights into Antioxidant Potential and Neuropharmacological Effects of Medicinal Herbs

Mohammad Qneibi1, Belal Rahhal1, *, Nidal Jaradat2, Mohammed Hawash2, Mohammad Qadi1, Linda Issa2, Sally Rajab2, Yasmeen Feras2, Nataly Bairat2, Sosana Bdir1, Mohammad Bdair1, Samia Ammar Aldwaik1, Samer Mudalal3*

1 Department of Biomedical Sciences, Faculty of Medicine and Health Sciences, An-Najah National University, Nablus, Palestine

2 Department of Pharmacy, Faculty of Medicine and Health Sciences, An-Najah National University, Nablus, Palestine

3 Department of Nutrition and Food Technology, Faculty of Agriculture and Veterinary Medicine, An-Najah National University, P.O. Box 7 Nablus, Palestine

*Correspondence: [samer.mudalal@najah.edu](mailto:samer.mudalal@najah.edu), and [belalrahhal@najah.edu](mailto:belalrahhal@najah.edu)

Table of Contents

**Table S1-3. Whole-Cell Recordings…………………………………………………………3-6**

The shown data is the mean ± standard error of the mean (SEM), with n = 10 being the number of patch cells in the whole-cell setup. The significance of the data was assessed using a one-way ANOVA test with the following thresholds: * p < 0.05; ** p < 0.01; *** p < 0.001; ns, not significant.

**Table S1. Whole-Cell Recordings**

| **Receptor Name/Compounds abbreviation** | **GluA1 (Glutamate Alone)** | **Artemisia judaica** | **Applying Glutamate Alone After Artemisia judaica** | **n** | **A/AI** |
| --- | --- | --- | --- | --- | --- |
| **Amplitude** | 875±78 | 249±25** | 823±73 | 10 | 3.58±0.13 |
| **(pA)** |
| **t deact** | 2.1±0.1 | 4.8±0.4** | N/R | 10 | N/R |
| **(ms)** |
| **t des** | 2.4±0.1 | 1.2±0.2** | N/R | 10 | N/R |
| **(ms)** |
| **Receptor Name/Compounds abbreviation** | **GluA1/2 (Glutamate Alone)** | **Artemisia judaica** | **Applying Glutamate Alone After Artemisia judaica** | **n** | **A/AI** |
| **Amplitude** | 635±56 | 171±15** | 590±55 | 10 | 3.81±0.23 |
| **(pA)** |
| **t deact** | 2.5±0.2 | 5.0±0.5** | N/R | 10 | N/R |
| **(ms)** |
| **t des** | 5.1±0.3 | 4.1±0.4* | N/R | 10 | N/R |
| **(ms)** |
| **Receptor Name/Compounds abbreviation** | **GluA2 (Glutamate Alone)** | **Artemisia judaica** | **Applying Glutamate Alone After Artemisia judaica** | **n** | **A/AI** |
| **Amplitude** | 1179±86 | 301±22** | 1102±86 | 10 | 3.98±0.15 |
| **(pA)** |
| **t deact** | 2.3±0.1 | 5.4±0.3** | N/R | 10 | N/R |
| **(ms)** |
| **t des** | 2.6±0.1 | 1.0±0.1** | N/R | 10 | N/R |
| **(ms)** |
| **Receptor Name/Compounds abbreviation** | **GluA2/3 (Glutamate Alone)** | **Artemisia judaica** | **Applying Glutamate Alone After Artemisia judaica** | **n** | **A/AI** |
| **Amplitude** | 512±52 | 141±15** | 478±54 | 10 | 3.78±0.26 |
| **(pA)** |
| **t deact** | 2.6±0.2 | 5.2±0.5** | N/R | 10 | N/R |
| **(ms)** |
| **t des** | 2.7±0.4 | 1.1±0.2** | N/R | 10 | N/R |
| **(ms)** |

**Table S2. Whole-Cell Recordings**

| **Receptor Name/Compounds abbreviation** | **GluA1 (Glutamate Alone)** | **Portulaca oleracea** | **Applying Glutamate Alone After Portulaca oleracea** | **n** | **A/AI** |
| --- | --- | --- | --- | --- | --- |
| **Amplitude** | 799±153 | 164±42** | 781±147 | 10 | 4.96±0.35 |
| **(pA)** |
| **t deact** | N/R | 6.0±0.4** | N/R | 10 | N/R |
| **(ms)** |
| **t des** | N/R | 1.1±0.1** | N/R | 10 | N/R |
| **(ms)** |
| **Receptor Name/Compounds abbreviation** | **GluA1/2 (Glutamate Alone)** | **Portulaca oleracea** | **Applying Glutamate Alone After Portulaca oleracea** | **n** | **A/AI** |
| **Amplitude** | 621±82 | 123±28** | 599±86 | 10 | 5.15±0.45 |
| **(pA)** |
| **t deact** | N/R | 6.2±0.5** | N/R | 10 | N/R |
| **(ms)** |
| **t des** | N/R | 3.8±0.3* | N/R | 10 | N/R |
| **(ms)** |
| **Receptor Name/Compounds abbreviation** | **GluA2 (Glutamate Alone)** | **Portulaca oleracea** | **Applying Glutamate Alone After Portulaca oleracea** | **n** | **A/AI** |
| **Amplitude** | 1132±112 | 212±33** | 1099±113 | 10 | 5.38±0.30 |
| **(pA)** |
| **t deact** | N/R | 6.5±0.3** | N/R | 10 | N/R |
| **(ms)** |
| **t des** | N/R | 0.9±0.1** | N/R | 10 | N/R |
| **(ms)** |
| **Receptor Name/Compounds abbreviation** | **GluA2/3 (Glutamate Alone)** | **Portulaca oleracea** | **Applying Glutamate Alone After Portulaca oleracea** | **n** | **A/AI** |
| **Amplitude** | 474±79 | 96±27** | 461±85 | 10 | 5.10±0.58 |
| **(pA)** |
| **1.1** | N/R | 6.1±0.5** | N/R | 10 | N/R |
| **(ms)** |
| **t des** | N/R | 1.0±0.2** | N/R | 10 | N/R |
| **(ms)** |

**Table S3. Whole-Cell Recordings**

| **Receptor Name/Compounds abbreviation** | **GluA1 (Glutamate Alone)** | **Terminalia chebula** | **Applying Glutamate Alone After Terminalia chebula** | **n** | **A/AI** |
| --- | --- | --- | --- | --- | --- |
| **Amplitude** | 827±120 | 128±31*** | 808±116 | 10 | 6.68±0.81 |
| **(pA)** |
| **t deact** | N/R | 8.3±0.5*** | N/R | 10 | N/R |
| **(ms)** |
| **t des** | N/R | 0.8±0.1*** | N/R | 10 | N/R |
| **(ms)** |
| **Receptor Name/Compounds abbreviation** | **GluA1/2 (Glutamate Alone)** | **Terminalia chebula** | **Applying Glutamate Alone After Terminalia chebula** | **n** | **A/AI** |
| **Amplitude** | 635±69 | 88±21*** | 613±74 | 10 | 6.85±0.87 |
| **(pA)** |
| **t deact** | N/R | 8.7±0.7*** | N/R | 10 | N/R |
| **(ms)** |
| **t des** | N/R | 2.9±0.3** | N/R | 10 | N/R |
| **(ms)** |
| **Receptor Name/Compounds abbreviation** | **GluA2 (Glutamate Alone)** | **Terminalia chebula** | **Applying Glutamate Alone After Terminalia chebula** | **n** | **A/AI** |
| **Amplitude** | 1143±99 | 149±26*** | 1110±101 | 10 | 7.34±0.59 |
| **(pA)** |
| **t deact** | N/R | 9.0±0.6*** | N/R | 10 | N/R |
| **(ms)** |
| **t des** | N/R | 0.6±0.06*** | N/R | 10 | N/R |
| **(ms)** |
| **Receptor Name/Compounds abbreviation** | **GluA2/3 (Glutamate Alone)** | **Terminalia chebula** | **Applying Glutamate Alone After Terminalia chebula** | **n** | **A/AI** |
| **Amplitude** | 483±66 | 69±21*** | 469±72 | 10 | 6.73±1.17 |
| **(pA)** |
| **t deact** | N/R | 8.5±0.7*** | N/R | 10 | N/R |
| **(ms)** |
| **t des** | N/R | 0.7±0.1*** | N/R | 10 | N/R |
| **(ms)** |
